# Supplementary material for: Assessing the Needs and Perspectives of Patients With Asthma and Chronic Obstructive Pulmonary Disease on Patient Web Portals: Focus Group Study
Source: JMIR Form Res. 2018 Nov 22;2(2):e22. doi: 10.2196/formative.8822 (PMC6334706; doi:10.2196/formative.8822)
Supplement: Multimedia Appendix 1 [file formative_v2i2e22_app1.pdf]

| Preferred self-management features | Comments                                                                                                                                                                                                                                                                                                                                                                                                                                                                                                                                                                                                                                                               | Illustrated by a citation                                                                                                                                                                  |
|------------------------------------|------------------------------------------------------------------------------------------------------------------------------------------------------------------------------------------------------------------------------------------------------------------------------------------------------------------------------------------------------------------------------------------------------------------------------------------------------------------------------------------------------------------------------------------------------------------------------------------------------------------------------------------------------------------------|--------------------------------------------------------------------------------------------------------------------------------------------------------------------------------------------|
| Disease monitoring                 | <ul style="list-style-type: none"> <li>• Most patients did not want self-monitoring</li> <li>• Some were worried about the reliability of physiological home measurements</li> <li>• Disease monitoring through with for example online questionnaire use would only be useful if the results will were discussed with healthcare professionals</li> <li>• Data presentation on a graph could be helpful (e.g., using baseline peak flows to detect deviations that guide contact with the doctor).</li> <li>• Adding details of an emergency plan in the PWP was advocated.</li> <li>• All agreed that the PWP should not substitute face-to-face contact.</li> </ul> | <ul style="list-style-type: none"> <li>• <i>"I know how I feel"</i></li> <li>• <i>"I think a questionnaire is more reliable compared to these [physiological] measurements"</i></li> </ul> |
| Making appointments online         | <ul style="list-style-type: none"> <li>• An online facility to make appointments was popular</li> <li>• This is unsuitable for assessing emergencies.</li> <li>• This should be reserved for scheduled assessments.</li> </ul>                                                                                                                                                                                                                                                                                                                                                                                                                                         | <ul style="list-style-type: none"> <li>• <i>"Like for a mechanical check-up for my car"</i></li> </ul>                                                                                     |
| Peer contact                       | <ul style="list-style-type: none"> <li>• Half of the patients would like to have face-to-face contact with other patients</li> <li>• only a minority would like to use an online</li> </ul>                                                                                                                                                                                                                                                                                                                                                                                                                                                                            | <ul style="list-style-type: none"> <li>• <i>"...would prefer to go to locations where [they] can meet peers to have face-to-face contact"</i></li> </ul>                                   |

|                                                      |                                                                                                                                                                                                                                                                                                                                                                                                                                              |                                                                                                                                                                                       |
|------------------------------------------------------|----------------------------------------------------------------------------------------------------------------------------------------------------------------------------------------------------------------------------------------------------------------------------------------------------------------------------------------------------------------------------------------------------------------------------------------------|---------------------------------------------------------------------------------------------------------------------------------------------------------------------------------------|
|                                                      | <p>patients forum because patients complain too much</p> <ul style="list-style-type: none"> <li>• Links to recommended patient forums could be provided.</li> </ul>                                                                                                                                                                                                                                                                          | <ul style="list-style-type: none"> <li>• <i>“In a patient forum [it] is like a competition: who is the sickest of all”</i></li> </ul>                                                 |
| Information for others to reduce social implications | <ul style="list-style-type: none"> <li>• Concise reference information to increase understanding for employers, friends, and family.</li> <li>• Greater use of pictures (easier to understand than text).</li> <li>• Lifestyle applications (e.g., smoking cessation or weight loss).</li> </ul>                                                                                                                                             |                                                                                                                                                                                       |
| Medication overview                                  | <ul style="list-style-type: none"> <li>• A medication overview with information about how and when to take medications including a facility to reorder prescriptions.</li> <li>• Some wanted to monitor their medication use, but others did not</li> <li>• A medication overview could allow changes in medication to be shared among healthcare professionals.</li> <li>• Educational videos showing correct inhaler technique.</li> </ul> | <ul style="list-style-type: none"> <li>• <i>“Which one [inhaler] should I take first?”</i></li> <li>• <i>“when I feel ill and tired, I won’t sit behind the computer!”</i></li> </ul> |
| Links to reliable websites                           | <ul style="list-style-type: none"> <li>• Links were requested to guide users to appropriate websites (e.g., from the Dutch Lung Foundation).</li> <li>• Including information about regulations regarding</li> </ul>                                                                                                                                                                                                                         |                                                                                                                                                                                       |

their illness and financial issues.

- Sources of self-management devices or specific ergonomic materials.

Information about inhaler technique

- Information about how to take you medication was mentioned by some patients.

- “If I would see this [inhaler technique in PWP] I would welcome that.”
